# Supplementary material for: Peaceful behaviour: a strategy employed by an obligate nest invader to avoid conflict with its host species
Source: bioRxiv or medRxiv preprint supplement (doi:10.1101/587592), 2019-03-24
Supplement: Supplementary file [file media-1.pdf]

This is a supplementary material for the paper:

1 **Peaceful behaviour: a strategy employed by an obligate nest invader**  
2 **to avoid conflict with its host species**

3  
4 Helder Hugo<sup>1,2,3,4\*</sup>, Paulo F. Cristaldo<sup>5</sup>, Og DeSouza<sup>4</sup>

5  
6 <sup>1</sup> Centre for the Advanced Study of Collective Behaviour, University of Konstanz, Germany

7 <sup>2</sup> Department of Collective Behaviour, Max Planck Institute for Ornithology, Germany

8 <sup>3</sup> Department of Biology, University of Konstanz, Germany

9 <sup>4</sup> Lab of Termitology, Federal University of Viçosa, Brazil

10 <sup>5</sup> Department of Agronomy, Federal Rural University of Pernambuco, Brazil

11  
12 \* Corresponding author: [helder.hugo.santos@gmail.com](mailto:helder.hugo.santos@gmail.com)

13  
14 **Contents:**

15 Table S1; Table S2; Figure S1; Figure S2; Video S1; Video S2; Video S3

16  
17 **Table S1.** Absolute numbers and percentage of Between-species and Within-species observations  
18 annotated from video-samples in closed arenas. Data is presented for hosts (*C. cyphergaster*) and  
19 inquilines (*I. microcerus*), and their respective castes.

20

| Group observed                           | Number of focal animals (n) | Observations     |                  |
|------------------------------------------|-----------------------------|------------------|------------------|
|                                          |                             | Between-species  | Within-species   |
| <b>HOSTS (<i>C. cyphergaster</i>)</b>    | <b>10</b>                   | <b>199 (32%)</b> | <b>421 (68%)</b> |
| Host workers                             | 5                           | 106 (34%)        | 204 (66%)        |
| Host soldiers                            | 5                           | 93 (30%)         | 217 (70%)        |
| <b>INQUILINES (<i>I. microcerus</i>)</b> | <b>10</b>                   | <b>125 (20%)</b> | <b>495 (80%)</b> |
| Inquiline workers                        | 5                           | 25 (8%)          | 285 (92%)        |
| Inquiline soldiers                       | 5                           | 100 (32%)        | 210 (68%)        |
| <b>TOTAL</b>                             | <b>20</b>                   | <b>324 (26%)</b> | <b>916 (74%)</b> |

21  
22

23 **Table S2** Adjacency matrices containing the behavioural change for each caste of hosts (*C. cyphergaster*)  
 24 and inquiline (*I. microcerus*). The data was used to extract centrality measures and draw the networks in  
 25 yED (Abbreviations: walk=walking; rest=resting; aW=antennating wall; aCS=antennating nestmate;  
 26 aHS=antennating non-nestmate; ig=ignoring; pa=bypassing; rever=reversing; att=attacking).

| Adjacency matrix - <i>Constrictotermes cyphergaster</i> (worker) |     |     |    |     |    |    |      |       |      |
|------------------------------------------------------------------|-----|-----|----|-----|----|----|------|-------|------|
|                                                                  | aCS | aHS | aW | att | ig | pa | rest | rever | walk |
| aCS                                                              | 4   | 1   | 3  | 0   | 0  | 0  | 0    | 0     | 8    |
| aHS                                                              | 1   | 0   | 0  | 3   | 1  | 0  | 0    | 0     | 3    |
| aW                                                               | 3   | 1   | 16 | 2   | 1  | 0  | 0    | 0     | 3    |
| att                                                              | 3   | 1   | 3  | 11  | 1  | 1  | 0    | 0     | 6    |
| ig                                                               | 1   | 1   | 1  | 1   | 0  | 0  | 0    | 0     | 2    |
| pa                                                               | 3   | 0   | 1  | 0   | 0  | 0  | 0    | 0     | 2    |
| rest                                                             | 0   | 0   | 0  | 1   | 0  | 1  | 1    | 0     | 2    |
| rever                                                            | 0   | 1   | 0  | 1   | 0  | 0  | 0    | 0     | 1    |
| walk                                                             | 1   | 3   | 3  | 9   | 3  | 3  | 3    | 3     | 26   |

| Adjacency matrix - <i>Constrictotermes cyphergaster</i> (soldier) |     |     |    |     |    |    |      |       |      |
|-------------------------------------------------------------------|-----|-----|----|-----|----|----|------|-------|------|
|                                                                   | aCS | aHS | aW | att | ig | pa | rest | rever | walk |
| aCS                                                               | 2   | 1   | 4  | 1   | 0  | 1  | 0    | 1     | 7    |
| aHS                                                               | 0   | 2   | 1  | 0   | 0  | 1  | 2    | 0     | 3    |
| aW                                                                | 2   | 0   | 6  | 2   | 3  | 0  | 0    | 1     | 1    |
| att                                                               | 2   | 1   | 1  | 1   | 0  | 1  | 1    | 0     | 2    |
| ig                                                                | 0   | 2   | 1  | 0   | 2  | 1  | 0    | 1     | 4    |
| pa                                                                | 1   | 0   | 0  | 0   | 0  | 0  | 0    | 2     | 3    |
| rest                                                              | 2   | 1   | 0  | 1   | 2  | 0  | 15   | 0     | 0    |
| rever                                                             | 1   | 0   | 0  | 0   | 0  | 0  | 0    | 1     | 7    |
| walk                                                              | 6   | 4   | 3  | 4   | 4  | 2  | 3    | 3     | 24   |

| Adjacency matrix - <i>Inquilinitermes microcerus</i> (worker) |     |     |    |    |    |      |       |      |     |
|---------------------------------------------------------------|-----|-----|----|----|----|------|-------|------|-----|
|                                                               | aCS | aHS | aW | ig | pa | rest | rever | walk | att |
| aCS                                                           | 11  | 1   | 3  | 0  | 0  | 9    | 0     | 6    | 0   |
| aHS                                                           | 1   | 0   | 0  | 0  | 0  | 1    | 0     | 1    | 0   |
| aW                                                            | 1   | 1   | 2  | 1  | 0  | 0    | 0     | 2    | 0   |
| ig                                                            | 1   | 0   | 0  | 2  | 0  | 0    | 1     | 0    | 0   |
| pa                                                            | 1   | 0   | 0  | 0  | 0  | 0    | 0     | 2    | 0   |
| rest                                                          | 7   | 1   | 0  | 2  | 1  | 24   | 0     | 11   | 0   |
| rever                                                         | 0   | 0   | 1  | 0  | 0  | 3    | 0     | 1    | 0   |
| walk                                                          | 8   | 0   | 1  | 1  | 2  | 12   | 3     | 25   | 0   |
| att                                                           | 0   | 0   | 0  | 0  | 0  | 0    | 0     | 0    | 0   |

| Adjacency matrix - <i>Inquilinitermes microcerus</i> (soldier) |     |     |    |     |    |    |      |       |      |
|----------------------------------------------------------------|-----|-----|----|-----|----|----|------|-------|------|
|                                                                | aCS | aHS | aW | att | ig | pa | rest | rever | walk |
| aCS                                                            | 5   | 2   | 0  | 0   | 1  | 0  | 0    | 1     | 10   |
| aHS                                                            | 0   | 1   | 0  | 2   | 0  | 1  | 0    | 0     | 3    |
| aW                                                             | 1   | 0   | 0  | 0   | 0  | 1  | 0    | 0     | 2    |
| att                                                            | 0   | 1   | 0  | 12  | 0  | 0  | 0    | 2     | 5    |
| ig                                                             | 0   | 0   | 1  | 0   | 1  | 0  | 0    | 1     | 4    |
| pa                                                             | 0   | 1   | 0  | 0   | 0  | 0  | 2    | 2     | 4    |
| rest                                                           | 0   | 0   | 0  | 0   | 1  | 0  | 4    | 0     | 3    |
| rever                                                          | 2   | 0   | 2  | 0   | 0  | 3  | 0    | 2     | 5    |
| walk                                                           | 11  | 2   | 1  | 6   | 4  | 4  | 1    | 6     | 27   |

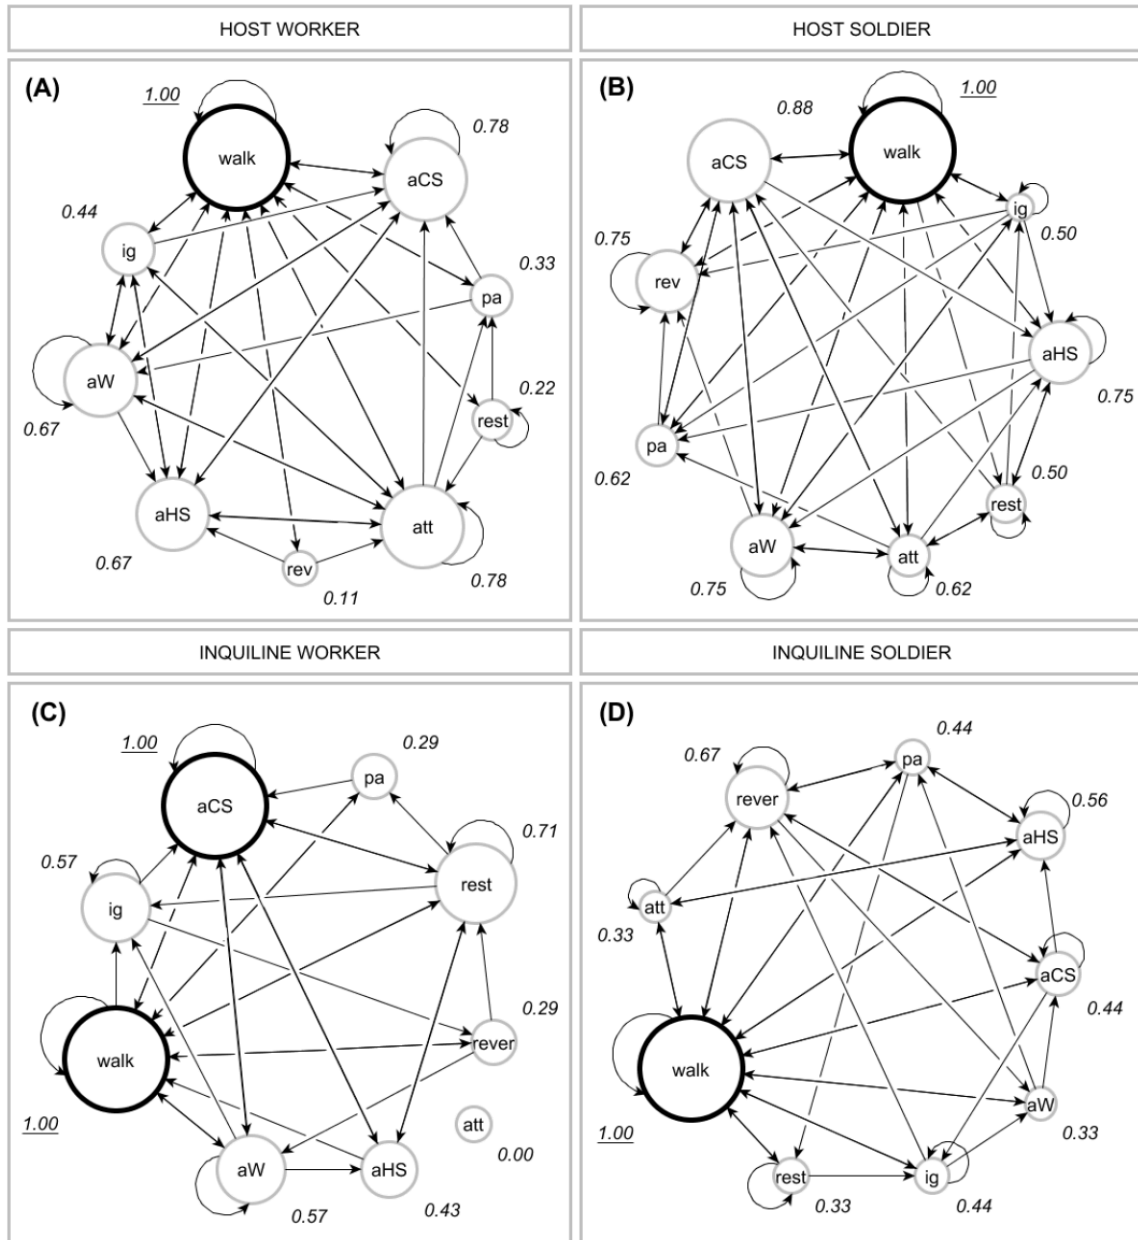

28

29 **Figure S1.** Behavioural profiles observed for each caste (with scores of centrality measure). Nodes  
 30 represent behaviours performed by individuals, whereas connecting edges (arrows) represent  
 31 behavioural changes occurred from one behaviour to another. Behaviours with the highest influence othe  
 32 n network are highlighted with thicker node contours. Node size was adjusted using calculated centrality  
 33 measures (scores) to visually represent the degree of influence exerted by each behaviour upon the  
 34 profiles. (Abbreviations: walk=walking; rest=resting; aW=antennating wall; aCS=antennating nestmate;  
 35 aHS=antennating non-nestmate; ig=ignoring; pa=bypassing; rever=reversing; att=attacking).

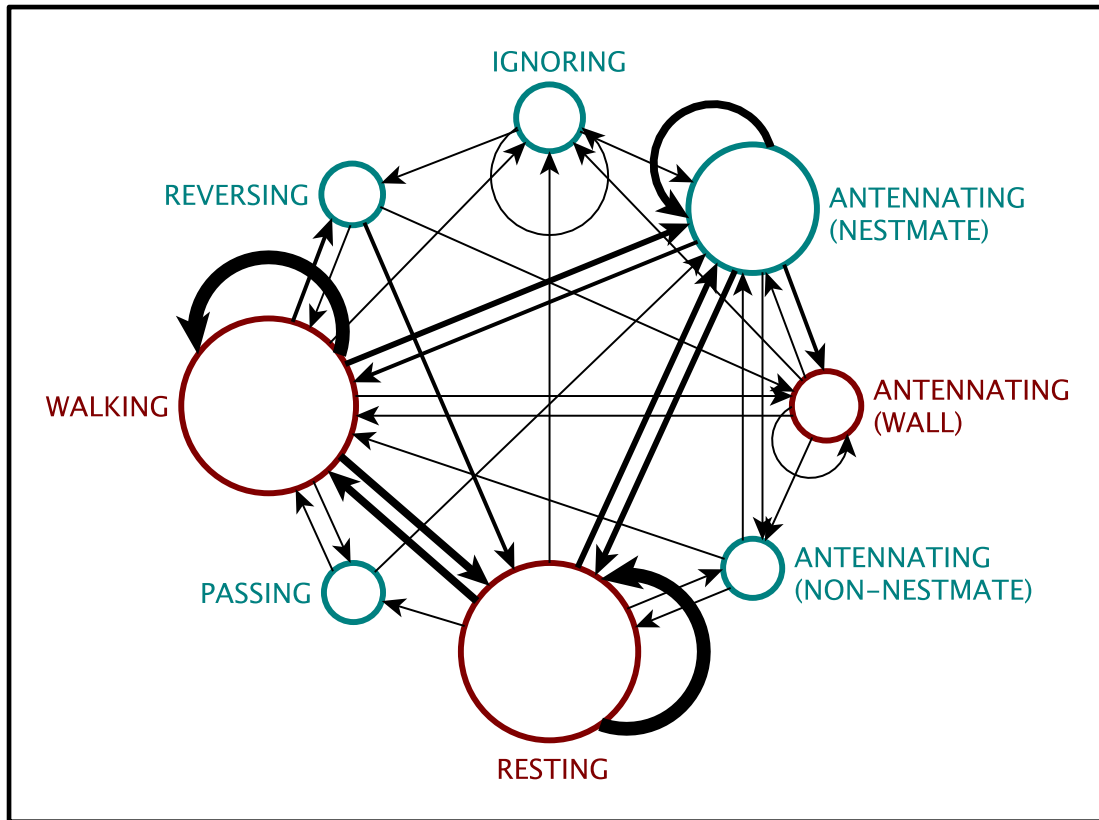

36

37 **Figure S2.** Behavioural change for inquiline workers: nodes represent behaviours performed by  
 38 individuals, whereas connecting edges (arrows) represent behavioural changes occurred from one  
 39 behaviour to another. Node size was adjusted using behavioural frequencies extracted from the  
 40 annotation. The width of edges indicate how frequently a given behavioural change occurred.  
 41

42 **Video S1**

43 **S1\_snapping.mov**

44 This video was recorded in lab conditions with a fixed individual of *Termes* sp.. It shows the mechanism of  
 45 snapping, also present in *I. microcerus* and other termite species with soldiers provided of slender  
 46 mandibles.

47

48 **Video S2**

49 **S2\_snapping2.mov**

50 This video was recorded in lab conditions with a free individual of *I. microceus* in the presence of *C.*  
 51 *cyphergaster*. It shows snapping events performed by the inquiline soldier of in retaliation to host threats.

52

53 **Video S3**

54 **S3\_defecation.mov**

55 This video was recorded in lab conditions with individuals of *I. microceus* and *C. cyphergaster* in  
 56 experimental arenas. It shows the aggressive nature of host-inquiline encounters and some of the evasive  
 57 behaviours performed by inquilines as response. Markers were included to highlight when aggressive  
 58 interactions happened. The defensive mechanism using defecation is the depicted in the footage with  
 59 several events.
